# Supplementary material
Source: ML conference proceedings conference paper supplement (https://openaccess.thecvf.com/content/CVPR2026/html/Jiang_Perception_Characteristics_Distance_CVPR_2026_paper.html)
Supplement: Supplementary file 1 [file Jiang_Perception_Characteristics_Distance_CVPR_2026_supplemental.pdf]

# Perception Characteristics Distance: Measuring Stability and Robustness of Perception System in Dynamic Conditions under a Certain Decision Rule

## Supplementary Material

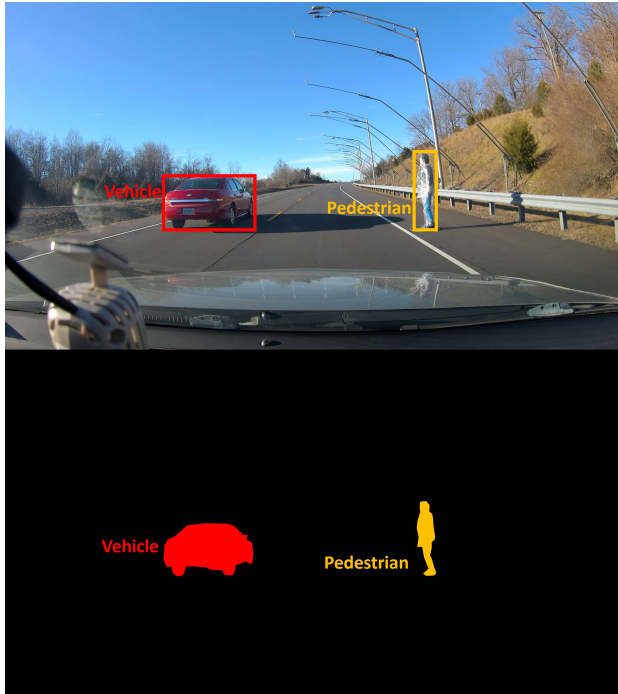

Figure 10. Example of ground-truth bounding box and instance mask under clear daylight (vehicle: 9.751 m, pedestrian: 9.817 m from ego vehicle).

### 7. SensorRainFall Dataset Description

The SensorRainFall dataset offers a uniquely high-fidelity benchmark for evaluating perception robustness under precipitation. This dataset enables modeling of perception variability across distance, rainfall intensity, and lighting conditions, making it particularly well suited for uncertainty-aware metrics such as PCD.

The SensorRainFall dataset was developed under realistic yet highly controlled conditions. It was collected on the Virginia Smart Roads facility, which supports precise simulation of weather and lighting scenarios. The rainfall was generated using weather simulation towers spaced at 10 meters, producing two nominal rainfall intensities—20 mm/h (heavy rain) and 40 mm/h (excessive rain)—as verified using a Weather Characterizer system based on OTT Parsivel2 laser disdrometry.

To ensure safety and repeatability, target objects were positioned one lane offset from the ego vehicle’s path—an approach validated during pilot testing to produce comparable sensor responses to in-lane positioning. Testing

was conducted across three ambient lighting settings (daylight, night, and night with overhead 3000 K LED streetlights) and four sensor modalities (camera, lidar, radar, and an ADAS-specific object detection camera), with vehicle speed ranging between 10–55 mph.

Target objects consisted of a red sedan and an ISO 19206-compliant surrogate pedestrian, with the latter wrapped in a plastic poncho to prevent rain damage. Pilot testing confirmed that the poncho created a “halo” effect that improved visibility; thus, it was consistently applied across both rainy and non-rainy runs to isolate rainfall effects. Target positions were recorded using differential GPS (DGPS), and all sensor outputs were time-synchronized using a Robot Operating System (ROS)–based architecture. A summary of the SensorRainFall dataset, along with descriptive statistics of the distance between the ego vehicle and target objects across all environmental conditions, is provided in Table 2.

Table 2. SensorRainfall dataset overview.

|                           | Clear daylight | Rainy daylight | Rainy night | Rainy night under streetlights |
|---------------------------|----------------|----------------|-------------|--------------------------------|
| <b>Target: Vehicle</b>    |                |                |             |                                |
| Count of images           | 278            | 317            | 354         | 281                            |
| Mean*                     | 107.989        | 122.251        | 119.798     | 107.761                        |
| Std*                      | 61.852         | 69.800         | 72.988      | 61.088                         |
| Min*                      | 5.553          | 5.476          | 4.412       | 4.888                          |
| Median*                   | 105.976        | 121.208        | 114.734     | 107.240                        |
| Max*                      | 214.247        | 240.669        | 248.937     | 214.637                        |
| <b>Target: Pedestrian</b> |                |                |             |                                |
| Count of images           | 279            | 230            | 352         | 280                            |
| Mean*                     | 107.661        | 152.615        | 120.919     | 108.593                        |
| Std*                      | 61.947         | 55.303         | 72.654      | 60.889                         |
| Min*                      | 4.442          | 4.596          | 4.639       | 4.501                          |
| Median*                   | 105.847        | 156.005        | 115.997     | 107.946                        |
| Max*                      | 214.081        | 240.042        | 249.275     | 215.011                        |

\*Descriptive statistics of the distance (m) between the ego vehicle and the target.

Each image in the dataset was carefully examined by trained researchers and manually annotated with ground-truth bounding boxes and pixel-level segmentation masks for both the vehicle and the pedestrian, as illustrated in Fig-

ure 10. The annotations include precise bounding box coordinates (four corners) and detailed instance masks that capture the full spatial extent of each object. These high-resolution annotations enable both object detection and instance segmentation tasks and provide reliable ground truth for evaluating spatial accuracy across perception models.

## 8. Complete benchmark results

The complete results of all 16 experiments are presented in this section. Tables 3, 4, 5, and 6 report the detected variance change points at  $\alpha = 0.05$  for all benchmarks, including both the count and corresponding distance locations (m). Tables 7, 8, 9, and 10 provide comprehensive evaluation results using the proposed aPCD metric and conventional metrics ( $AP_{50:95}$ ,  $AP_{50}$ ,  $AP_{75}$ ,  $AP_S$ ,  $AP_M$ ,  $AP_L$ , AR, and  $F1_{50}$ ).

## 9. Benchmark setup and configuration

Deformable DETR employs a ResNet-50 backbone and uses a two-stage refinement mechanism to improve region proposal quality and localization. In our configuration, we build on the deformable-detr-refine\_r50 COCO recipe and enable the two-stage pipeline explicitly by setting `as_two_stage=True`.

Grounding DINO utilizes a Swin-B backbone initialized with a pretraining image size of  $384 \times 384$ , uses 128 embedding dimensions, and follows a [2, 2, 18, 2] depth configuration with a window size of 12 and a drop-path rate of 0.3. The multi-head self-attention stages use [4, 8, 16, 32] heads, matching the Swin-B architecture. The neck is adapted to process the high-dimensional feature maps (256/512/1024 channels) produced by the backbone.

DyHead integrates an ATSS detection head with a Swin Transformer backbone and a hybrid FPN-DyHead neck, following the official COCO training recipe. The model uses a Swin-Large backbone pretrained on ImageNet-22K at a resolution of  $384 \times 384$ , producing multi-scale feature maps with 384, 768, and 1536 channels. These features are fed into a five-level Feature Pyramid Network (FPN) with 256-channel outputs and subsequently refined using a six-block DyHead module that applies dynamic, scale-aware attention to strengthen spatial and semantic feature fusion. The ATSS head operates on 256-channel inputs with a  $1 \times 1$  prediction kernel, a single-ratio anchor generator,  $\Delta XYWH$  bounding-box coding, and employs Focal Loss for classification, GIoU Loss for regression, and a centerness term for improved localization. Training follows the ATSSAssigner with `top-k=9`, and uses a data pipeline that includes multi-scale random resizing between  $2000 \times 480$  and  $2000 \times 1200$ , random horizontal flipping, and dataset repetition to stabilize optimization for the large Transformer backbone. Optimization is performed using AdamW with a learning rate

of  $5 \times 10^{-5}$ , along with parameter-wise weight-decay handling for positional embeddings, relative-bias tables, and normalization layers. During inference, images are resized to  $2000 \times 1200$ , and detections are generated using non-maximum suppression with an IoU threshold of 0.6, keeping up to 100 predictions per image.

YOLOX uses a CSPDarknet backbone (`deepen = 0.33`, `widen = 0.50`), a YOLOX-PAFPN neck with 128 output channels, and a decoupled YOLOX head trained on COCO with strong augmentation. In our configuration, the network is scaled up substantially: the backbone `deepen` and `widen` factors are increased to 1.33 and 1.25, producing a deeper and wider CSPDarknet. The neck is also enlarged, taking 320/640/1280-channel inputs from the backbone and outputting 320-channel features with four CSP blocks. The YOLOX head is widened accordingly to 320 channels.

GLIP features a Swin-S backbone with 192 embedding dimensions, stage depths of [2, 2, 18, 2], and a window size of 12, together with an increased drop-path rate of 0.4 for stronger regularization. The FPN neck is adapted to process multi-scale features of 384, 768, and 1536 channels from the backbone. The ATSS-style bounding box head is enhanced through early fusion of text and visual features and expanded to eight DyHead blocks, with gradient checkpointing enabled to reduce memory consumption. The model is initialized from the publicly available GLIP-L pretrained weights.

Mask R-CNN is configured with a ResNeXt-101-64 $\times$ 4d backbone and a Feature Pyramid Network (FPN) neck. The backbone uses 101 layers, 64 groups, a base width of 4, four stages with outputs at all stages, and frozen parameters in the first stage. Batch normalization is applied with trainable parameters, and the PyTorch-style configuration is used. The backbone is initialized from the official ResNeXt-101-64 $\times$ 4d pretrained checkpoint. Training follows a multi-scale polynomial learning rate schedule and a  $3 \times$  COCO schedule.

ConvNeXt-V2 is implemented in a Mask R-CNN framework using a ConvNeXt-V2-B backbone pretrained with FCMAE. The backbone employs the `base` configuration with `out_indices=[0, 1, 2, 3]`, a drop-path rate of 0.4, GRN enabled, and initialization from the FCMAE checkpoint. An FPN neck processes feature maps of 128, 256, 512, and 1024 channels. Training uses large-scale jittering at a resolution of  $1024 \times 1024$ , random cropping, and a 36-epoch schedule with linear warm-up and multi-step learning rate decay. Optimization is performed with AdamW and layer-wise learning rate decay, and testing applies NMS in the RPN and soft-NMS in the RCNN.

SOLOv2 is configured with a ResNeXt-101-64 $\times$ 4d backbone in which DCNv2 deformable convolutions are enabled for stages 2-4, and the backbone is initialized from the official pretrained ResNeXt-101 checkpoint. An FPN

Table 3. Detected variance change points ( $\alpha = 0.05$ ) across benchmarks: Object detection, Vehicle.

| Model                          | Number of variance change points | $x_{\tau_1}$ (m) | $x_{\tau_2}$ (m) | $x_{\tau_3}$ (m) | $x_{\tau_4}$ (m) | $x_{\tau_5}$ (m) |
|--------------------------------|----------------------------------|------------------|------------------|------------------|------------------|------------------|
| Clear daylight                 |                                  |                  |                  |                  |                  |                  |
| Deformable DETR                | 0                                | –                | –                | –                | –                | –                |
| Grounding DINO                 | 2                                | 29.407           | 154.556          | –                | –                | –                |
| DyHead                         | 2                                | 109.377          | 198.193          | –                | –                | –                |
| YOLOX                          | 3                                | 36.513           | 133.427          | 170.522          | –                | –                |
| GLIP                           | 2                                | 81.399           | 154.556          | –                | –                | –                |
| Rainy daylight                 |                                  |                  |                  |                  |                  |                  |
| Deformable DETR                | 3                                | 130.054          | 189.140          | 198.106          | –                | –                |
| Grounding DINO                 | 4                                | 81.681           | 87.833           | 190.611          | 217.114          | –                |
| DyHead                         | 4                                | 16.037           | 84.795           | 195.101          | 208.407          | –                |
| YOLOX                          | 3                                | 119.157          | 138.339          | 153.980          | –                | –                |
| GLIP                           | 3                                | 41.514           | 110.335          | 158.641          | –                | –                |
| Rainy night                    |                                  |                  |                  |                  |                  |                  |
| Deformable DETR                | 5                                | 31.169           | 51.627           | 122.244          | 211.178          | 218.465          |
| Grounding DINO                 | 4                                | 51.627           | 164.393          | 209.696          | 215.572          | –                |
| DyHead                         | 3                                | 82.943           | 117.468          | 211.178          | –                | –                |
| YOLOX                          | 4                                | 70.742           | 87.990           | 104.899          | 186.902          | –                |
| GLIP                           | 2                                | 148.341          | 240.375          | –                | –                | –                |
| Rainy night under streetlights |                                  |                  |                  |                  |                  |                  |
| Deformable DETR                | 3                                | 46.315           | 54.084           | 146.579          | –                | –                |
| Grounding DINO                 | 3                                | 49.268           | 107.240          | 177.282          | –                | –                |
| DyHead                         | 3                                | 22.784           | 39.309           | 148.470          | –                | –                |
| YOLOX                          | 3                                | 65.933           | 77.431           | 165.402          | –                | –                |
| GLIP                           | 2                                | 92.664           | 142.363          | –                | –                | –                |

Table 4. Detected variance change points ( $\alpha = 0.05$ ) across benchmarks: Object detection, Pedestrian.

| Model                          | Number of variance change points | $x_{\tau_1}$ (m) | $x_{\tau_2}$ (m) | $x_{\tau_3}$ (m) |
|--------------------------------|----------------------------------|------------------|------------------|------------------|
| Clear daylight                 |                                  |                  |                  |                  |
| Deformable DETR                | 3                                | 60.610           | 133.429          | 170.443          |
| Grounding DINO                 | 2                                | 57.731           | 109.034          | –                |
| DyHead                         | 3                                | 81.144           | 109.438          | 189.473          |
| YOLOX                          | 2                                | 66.391           | 125.249          | –                |
| GLIP                           | 2                                | 67.841           | 116.894          | –                |
| Rainy daylight                 |                                  |                  |                  |                  |
| Deformable DETR                | 3                                | 71.048           | 137.862          | 173.446          |
| Grounding DINO                 | 2                                | 60.182           | 159.687          | –                |
| DyHead                         | 3                                | 66.157           | 111.520          | 168.912          |
| YOLOX                          | 3                                | 42.607           | 128.127          | 182.582          |
| GLIP                           | 3                                | 107.546          | 142.961          | 171.961          |
| Rainy night                    |                                  |                  |                  |                  |
| Deformable DETR                | 2                                | 49.710           | 105.067          | –                |
| Grounding DINO                 | 2                                | 66.170           | 109.308          | –                |
| DyHead                         | 2                                | 76.553           | 109.308          | –                |
| YOLOX                          | 2                                | 57.243           | 87.212           | –                |
| GLIP                           | 2                                | 76.552           | 118.000          | –                |
| Rainy night under streetlights |                                  |                  |                  |                  |
| Deformable DETR                | 2                                | 83.928           | 134.777          | –                |
| Grounding DINO                 | 2                                | 57.603           | 121.279          | –                |
| DyHead                         | 2                                | 40.958           | 122.783          | –                |
| YOLOX                          | 1                                | 77.980           | –                | –                |
| GLIP                           | 2                                | 64.637           | 124.293          | –                |

neck processes multi-scale feature maps for instance segmentation. The mask head employs DCNv2 for all convolutional layers through both the mask feature head and the

main mask head configuration. Training follows the multi-scale strategy defined in the base configuration and uses a  $3\times$  schedule on the COCO dataset.

Table 5. Detected variance change points ( $\alpha = 0.05$ ) across benchmarks: Instance segmentation, Vehicle.

| Model                          | Number of variance change points | $x_{\tau_1}$ (m) | $x_{\tau_2}$ (m) | $x_{\tau_3}$ (m) | $x_{\tau_4}$ (m) |
|--------------------------------|----------------------------------|------------------|------------------|------------------|------------------|
| Clear daylight                 |                                  |                  |                  |                  |                  |
| Mask R-CNN                     | 3                                | 33.670           | 60.446           | 152.926          | –                |
| ConvNeXt-V2                    | 3                                | 75.422           | 131.801          | 175.657          | –                |
| SOLOv2                         | 2                                | 72.465           | 121.949          | –                | –                |
| Mask2Former                    | 4                                | 54.697           | 69.518           | 167.761          | 173.679          |
| RTMDet                         | 3                                | 46.122           | 150.112          | 186.139          | –                |
| Rainy daylight                 |                                  |                  |                  |                  |                  |
| Mask R-CNN                     | 2                                | 141.458          | 159.004          | –                | –                |
| ConvNeXt-V2                    | 2                                | 63.918           | 153.980          | –                | –                |
| SOLOv2                         | 3                                | 52.074           | 141.458          | 163.257          | –                |
| Mask2Former                    | 4                                | 41.514           | 84.795           | 187.994          | 202.521          |
| RTMDet                         | 4                                | 16.037           | 122.468          | 158.641          | 181.621          |
| Rainy night                    |                                  |                  |                  |                  |                  |
| Mask R-CNN                     | 4                                | 70.742           | 141.67           | 178.982          | 199.641          |
| ConvNeXt-V2                    | 3                                | 17.985           | 88.327           | 186.902          | –                |
| SOLOv2                         | 3                                | 60.461           | 193.126          | 213.022          | –                |
| Mask2Former                    | 3                                | 62.057           | 108.764          | 200.74           | –                |
| RTMDet                         | 4                                | 50.379           | 97.558           | 191.583          | 210.083          |
| Rainy night under streetlights |                                  |                  |                  |                  |                  |
| Mask R-CNN                     | 2                                | 95.259           | 157.346          | –                | –                |
| ConvNeXt-V2                    | 3                                | 91.167           | 107.612          | 186.633          | –                |
| SOLOv2                         | 3                                | 56.666           | 74.449           | 174.194          | –                |
| Mask2Former                    | 2                                | 68.520           | 165.020          | –                | –                |
| RTMDet                         | 3                                | 95.259           | 194.742          | 211.892          | –                |

Table 6. Detected variance change points ( $\alpha = 0.05$ ) across benchmarks: Instance segmentation, Pedestrian.

| Model                          | Number of variance change points | $x_{\tau_1}$ (m) | $x_{\tau_2}$ (m) | $x_{\tau_3}$ (m) |
|--------------------------------|----------------------------------|------------------|------------------|------------------|
| Clear daylight                 |                                  |                  |                  |                  |
| Mask R-CNN                     | 2                                | 84.149           | 118.716          | –                |
| ConvNeXt-V2                    | 2                                | 60.610           | 116.894          | –                |
| SOLOv2                         | 2                                | 53.436           | 107.423          | –                |
| Mask2Former                    | 2                                | 77.037           | 130.156          | –                |
| RTMDet                         | 3                                | 56.314           | 104.262          | 172.027          |
| Rainy daylight                 |                                  |                  |                  |                  |
| Mask R-CNN                     | 2                                | 92.918           | 158.135          | –                |
| ConvNeXt-V2                    | 2                                | 73.693           | 136.679          | –                |
| SOLOv2                         | 2                                | 87.209           | 150.370          | –                |
| Mask2Former                    | 3                                | 79.714           | 113.804          | 158.135          |
| RTMDet                         | 2                                | 66.157           | 113.449          | –                |
| Rainy night                    |                                  |                  |                  |                  |
| Mask R-CNN                     | 0                                | –                | –                | –                |
| ConvNeXt-V2                    | 0                                | –                | –                | –                |
| SOLOv2                         | 0                                | –                | –                | –                |
| Mask2Former                    | 0                                | –                | –                | –                |
| RTMDet                         | 0                                | –                | –                | –                |
| Rainy night under streetlights |                                  |                  |                  |                  |
| Mask R-CNN                     | 0                                | –                | –                | –                |
| ConvNeXt-V2                    | 0                                | –                | –                | –                |
| SOLOv2                         | 0                                | –                | –                | –                |
| Mask2Former                    | 0                                | –                | –                | –                |
| RTMDet                         | 0                                | –                | –                | –                |

Mask2Former is configured with a Swin-S backbone using a patch size of 4, a window size of 7, and stage depths of [2, 2, 18, 2], initialized from the official pretrained weights.

The architecture includes a pixel decoder and a transformer decoder head for mask prediction. Training follows a large-scale jittering strategy over 50 epochs with an  $8 \times 2$  batch

Table 7. Evaluation results of benchmarks: Object detection, Vehicle.

| Model                          | aPCD (m)       | Mean of IoU $\times$ Confidence score | AP <sub>50:95</sub> | AP <sub>50</sub> | AP <sub>75</sub> | AP <sub>S</sub> | AP <sub>M</sub> | AP <sub>L</sub> | AR           | F1 <sub>50</sub> |
|--------------------------------|----------------|---------------------------------------|---------------------|------------------|------------------|-----------------|-----------------|-----------------|--------------|------------------|
| Clear daylight                 |                |                                       |                     |                  |                  |                 |                 |                 |              |                  |
| Deformable DETR                | <b>104.855</b> | <b>0.487</b>                          | 0.511               | <b>0.947</b>     | 0.439            | <b>0.921</b>    | <b>0.982</b>    | <b>0.956</b>    | 0.552        | <b>0.974</b>     |
| Grounding DINO                 | 92.685         | 0.425                                 | <b>0.553</b>        | 0.777            | 0.594            | 0.684           | <b>0.982</b>    | <b>0.956</b>    | <b>0.568</b> | 0.867            |
| DyHead                         | 70.990         | 0.337                                 | 0.533               | 0.719            | <b>0.616</b>     | 0.585           | <b>0.982</b>    | <b>0.956</b>    | 0.564        | 0.832            |
| YOLOX                          | 73.105         | 0.336                                 | 0.401               | 0.548            | 0.427            | 0.257           | <b>0.982</b>    | <b>0.956</b>    | 0.452        | 0.716            |
| GLIP                           | 60.164         | 0.257                                 | 0.421               | 0.517            | 0.469            | 0.310           | <b>0.982</b>    | <b>0.956</b>    | 0.442        | 0.655            |
| Rainy daylight                 |                |                                       |                     |                  |                  |                 |                 |                 |              |                  |
| Deformable DETR                | 57.224         | 0.249                                 | 0.367               | 0.583            | 0.372            | 0.491           | 0.777           | 0.846           | 0.370        | 0.739            |
| Grounding DINO                 | <b>86.593</b>  | <b>0.354</b>                          | <b>0.484</b>        | <b>0.684</b>     | <b>0.526</b>     | <b>0.565</b>    | <b>0.984</b>    | <b>0.923</b>    | <b>0.487</b> | <b>0.814</b>     |
| DyHead                         | 66.010         | 0.274                                 | 0.468               | 0.634            | 0.533            | 0.500           | <b>0.984</b>    | 0.884           | 0.471        | 0.778            |
| YOLOX                          | 52.426         | 0.208                                 | 0.323               | 0.413            | 0.353            | 0.223           | 0.857           | <b>0.923</b>    | 0.326        | 0.587            |
| GLIP                           | 42.591         | 0.166                                 | 0.288               | 0.328            | 0.324            | 0.083           | 0.936           | <b>0.923</b>    | 0.292        | 0.497            |
| Rainy night                    |                |                                       |                     |                  |                  |                 |                 |                 |              |                  |
| Deformable DETR                | 3.846          | 0.021                                 | 0.056               | 0.133            | 0.04             | 0.029           | 0.220           | 0.645           | 0.058        | 0.239            |
| Grounding DINO                 | 29.583         | 0.156                                 | 0.125               | 0.297            | 0.105            | 0.087           | 0.634           | <b>0.968</b>    | 0.128        | 0.461            |
| DyHead                         | 21.546         | 0.121                                 | <b>0.144</b>        | <b>0.362</b>     | 0.107            | <b>0.154</b>    | <b>0.720</b>    | <b>0.968</b>    | <b>0.146</b> | <b>0.534</b>     |
| YOLOX                          | 23.772         | 0.102                                 | 0.106               | 0.212            | 0.107            | 0.017           | 0.476           | <b>0.968</b>    | 0.109        | 0.353            |
| GLIP                           | <b>37.299</b>  | <b>0.182</b>                          | 0.133               | 0.288            | <b>0.119</b>     | 0.050           | 0.707           | <b>0.968</b>    | 0.136        | 0.451            |
| Rainy night under streetlights |                |                                       |                     |                  |                  |                 |                 |                 |              |                  |
| Deformable DETR                | 4.829          | 0.032                                 | 0.049               | 0.121            | 0.032            | 0.026           | 0.197           | 0.560           | 0.052        | 0.222            |
| Grounding DINO                 | <b>34.287</b>  | <b>0.182</b>                          | <b>0.235</b>        | 0.505            | 0.185            | 0.311           | <b>0.864</b>    | <b>0.960</b>    | <b>0.238</b> | 0.675            |
| DyHead                         | 37.115         | 0.180                                 | 0.226               | <b>0.527</b>     | <b>0.185</b>     | <b>0.379</b>    | 0.848           | 0.720           | 0.23         | <b>0.693</b>     |
| YOLOX                          | 32.213         | 0.157                                 | 0.187               | 0.391            | 0.157            | 0.195           | 0.712           | <b>0.960</b>    | 0.19         | 0.566            |
| GLIP                           | 34.283         | 0.145                                 | 0.150               | 0.327            | 0.128            | 0.058           | 0.848           | 0.920           | 0.154        | 0.497            |

Table 8. Evaluation results of benchmarks: Object detection, Pedestrian.

| Model                          | aPCD (m)      | Mean of IoU $\times$ Confidence score | AP <sub>50:95</sub> | AP <sub>50</sub> | AP <sub>75</sub> | AP <sub>S</sub> | AP <sub>M</sub> | AP <sub>L</sub> | AR           | F1 <sub>50</sub> |
|--------------------------------|---------------|---------------------------------------|---------------------|------------------|------------------|-----------------|-----------------|-----------------|--------------|------------------|
| Clear daylight                 |               |                                       |                     |                  |                  |                 |                 |                 |              |                  |
| Deformable DETR                | 25.308        | <b>0.132</b>                          | <b>0.135</b>        | <b>0.373</b>     | <b>0.065</b>     | <b>0.222</b>    | 0.875           | 0.800           | <b>0.138</b> | <b>0.547</b>     |
| Grounding DINO                 | 22.430        | 0.095                                 | 0.071               | 0.215            | 0.022            | 0.028           | 0.813           | 0.867           | 0.074        | 0.359            |
| DyHead                         | 22.407        | 0.110                                 | 0.093               | 0.308            | 0.032            | 0.130           | 0.917           | 0.800           | 0.096        | 0.475            |
| YOLOX                          | 13.534        | 0.049                                 | 0.035               | 0.107            | 0.010            | 0.0             | 0.312           | <b>0.933</b>    | 0.038        | 0.200            |
| GLIP                           | <b>27.392</b> | <b>0.132</b>                          | 0.099               | 0.269            | 0.036            | 0.065           | <b>0.979</b>    | 0.800           | 0.102        | 0.428            |
| Rainy daylight                 |               |                                       |                     |                  |                  |                 |                 |                 |              |                  |
| Deformable DETR                | 18.724        | 0.094                                 | 0.085               | 0.245            | 0.041            | 0.164           | 0.558           | 0.474           | 0.087        | 0.394            |
| Grounding DINO                 | 12.596        | 0.063                                 | 0.103               | 0.242            | 0.079            | 0.129           | 0.605           | 0.842           | 0.106        | 0.394            |
| DyHead                         | 20.846        | 0.098                                 | <b>0.147</b>        | <b>0.336</b>     | 0.113            | <b>0.195</b>    | 0.907           | 0.842           | <b>0.149</b> | <b>0.507</b>     |
| YOLOX                          | 7.991         | 0.029                                 | 0.042               | 0.101            | 0.028            | 0.039           | 0.116           | 0.789           | 0.044        | 0.188            |
| GLIP                           | <b>34.512</b> | <b>0.144</b>                          | 0.137               | 0.302            | <b>0.116</b>     | 0.145           | <b>0.930</b>    | <b>0.895</b>    | 0.139        | 0.467            |
| Rainy night                    |               |                                       |                     |                  |                  |                 |                 |                 |              |                  |
| Deformable DETR                | 4.563         | 0.022                                 | 0.043               | 0.077            | 0.043            | 0.0             | 0.488           | 0.294           | 0.046        | 0.147            |
| Grounding DINO                 | 14.107        | 0.060                                 | 0.105               | 0.190            | 0.102            | 0.048           | 0.878           | <b>0.882</b>    | 0.107        | <b>0.324</b>     |
| DyHead                         | 10.078        | 0.044                                 | 0.097               | 0.185            | 0.08             | <b>0.068</b>    | 0.805           | 0.588           | 0.099        | 0.316            |
| YOLOX                          | 6.016         | 0.023                                 | 0.059               | 0.111            | 0.057            | 0.014           | 0.512           | 0.706           | 0.061        | 0.204            |
| GLIP                           | <b>24.178</b> | <b>0.099</b>                          | <b>0.106</b>        | <b>0.190</b>     | <b>0.108</b>     | 0.041           | <b>0.927</b>    | <b>0.882</b>    | <b>0.109</b> | <b>0.324</b>     |
| Rainy night under streetlights |               |                                       |                     |                  |                  |                 |                 |                 |              |                  |
| Deformable DETR                | 4.129         | 0.016                                 | 0.027               | 0.046            | 0.032            | 0.0             | 0.208           | 0.583           | 0.03         | 0.095            |
| Grounding DINO                 | 10.167        | 0.033                                 | 0.044               | 0.071            | 0.054            | 0.0             | 0.333           | <b>0.917</b>    | 0.047        | 0.140            |
| DyHead                         | 5.542         | 0.023                                 | 0.048               | <b>0.082</b>     | 0.050            | <b>0.012</b>    | 0.417           | 0.667           | 0.051        | <b>0.158</b>     |
| YOLOX                          | 2.962         | 0.012                                 | 0.020               | 0.039            | 0.021            | 0.0             | 0.083           | 0.667           | 0.024        | 0.082            |
| GLIP                           | <b>13.588</b> | <b>0.046</b>                          | <b>0.049</b>        | <b>0.082</b>     | <b>0.057</b>     | 0.0             | <b>0.458</b>    | <b>0.917</b>    | <b>0.052</b> | <b>0.158</b>     |

configuration. Parameter-wise optimization is applied by assigning reduced learning rates to all backbone layers ( $lr\_mult=0.1$ ) and zero decay to normalization, posi-

tional embedding, query embedding, and level embedding parameters, as defined in the custom parameter rules.

RTMDet is configured with a CSPNeXt-X backbone us-

Table 9. Evaluation results of benchmarks: Instance segmentation, Vehicle.

| Model                          | aPCD (m)       | Mean of IoU $\times$ Confidence score | AP <sub>50:95</sub> | AP <sub>50</sub> | AP <sub>75</sub> | AP <sub>S</sub> | AP <sub>M</sub> | AP <sub>L</sub> | AR           | F1 <sub>50</sub> |
|--------------------------------|----------------|---------------------------------------|---------------------|------------------|------------------|-----------------|-----------------|-----------------|--------------|------------------|
| Clear daylight                 |                |                                       |                     |                  |                  |                 |                 |                 |              |                  |
| Mask R-CNN ok                  | 89.750         | 0.405                                 | 0.376               | 0.579            | 0.410            | 0.444           | 0.942           | <b>0.947</b>    | 0.381        | 0.736            |
| ConvNeXt-V2                    | 89.454         | 0.403                                 | 0.395               | 0.553            | 0.453            | 0.401           | <b>0.980</b>    | <b>0.947</b>    | 0.399        | 0.715            |
| SOLOv2                         | 36.572         | 0.165                                 | 0.233               | 0.276            | 0.276            | 0.028           | <b>0.980</b>    | <b>0.947</b>    | 0.237        | 0.438            |
| Mask2Former                    | <b>107.095</b> | <b>0.479</b>                          | <b>0.423</b>        | <b>0.633</b>     | <b>0.492</b>     | <b>0.507</b>    | <b>0.980</b>    | <b>0.947</b>    | <b>0.427</b> | <b>0.778</b>     |
| RTMDet                         | 43.471         | 0.210                                 | 0.349               | 0.593            | 0.338            | 0.454           | <b>0.980</b>    | <b>0.947</b>    | 0.353        | 0.747            |
| Rainy daylight                 |                |                                       |                     |                  |                  |                 |                 |                 |              |                  |
| Mask R-CNN                     | 67.237         | 0.250                                 | 0.249               | 0.381            | 0.246            | 0.292           | 0.563           | 0.894           | 0.252        | 0.556            |
| ConvNeXt-V2                    | 78.806         | 0.316                                 | 0.352               | 0.504            | 0.410            | 0.353           | <b>0.981</b>    | <b>0.947</b>    | 0.355        | 0.673            |
| SOLOv2                         | 24.957         | 0.099                                 | 0.144               | 0.201            | 0.157            | 0.090           | 0.399           | <b>0.947</b>    | 0.147        | 0.340            |
| Mask2Former                    | <b>107.037</b> | <b>0.421</b>                          | <b>0.380</b>        | <b>0.570</b>     | <b>0.429</b>     | <b>0.452</b>    | 0.927           | <b>0.947</b>    | <b>0.383</b> | <b>0.729</b>     |
| RTMDet                         | 35.252         | 0.152                                 | 0.212               | 0.365            | 0.201            | 0.185           | 0.945           | 0.894           | 0.215        | 0.539            |
| Rainy night                    |                |                                       |                     |                  |                  |                 |                 |                 |              |                  |
| Mask R-CNN                     | 19.096         | 0.090                                 | 0.075               | 0.153            | 0.072            | 0.0             | 0.500           | 0.778           | 0.078        | 0.269            |
| ConvNeXt-V2                    | <b>24.870</b>  | 0.128                                 | <b>0.094</b>        | <b>0.225</b>     | 0.072            | <b>0.026</b>    | <b>0.827</b>    | 0.806           | <b>0.096</b> | <b>0.371</b>     |
| SOLOv2                         | 11.661         | 0.069                                 | 0.090               | 0.186            | 0.075            | 0.0             | 0.673           | 0.833           | 0.092        | 0.318            |
| Mask2Former                    | 22.170         | 0.108                                 | 0.090               | 0.186            | 0.075            | 0.011           | 0.673           | 0.750           | 0.092        | 0.318            |
| RTMDet                         | 14.079         | 0.080                                 | 0.089               | 0.178            | <b>0.081</b>     | 0.0             | 0.577           | <b>0.917</b>    | 0.091        | 0.306            |
| Rainy night under streetlights |                |                                       |                     |                  |                  |                 |                 |                 |              |                  |
| Mask R-CNN                     | 23.587         | 0.095                                 | 0.073               | 0.152            | 0.068            | 0.032           | 0.500           | 0.600           | 0.076        | 0.268            |
| ConvNeXt-V2                    | <b>51.942</b>  | <b>0.223</b>                          | <b>0.160</b>        | <b>0.319</b>     | <b>0.152</b>     | <b>0.151</b>    | <b>0.929</b>    | 0.800           | <b>0.163</b> | <b>0.487</b>     |
| SOLOv2                         | 12.976         | 0.062                                 | 0.069               | 0.121            | 0.071            | 0.0             | 0.357           | 0.767           | 0.072        | 0.220            |
| Mask2Former                    | 30.648         | 0.136                                 | 0.104               | 0.186            | 0.115            | 0.012           | 0.786           | 0.733           | 0.106        | 0.318            |
| RTMDet                         | 21.757         | 0.098                                 | 0.110               | 0.207            | 0.121            | 0.020           | 0.833           | <b>0.833</b>    | 0.113        | 0.348            |

Table 10. Evaluation results of benchmarks: Instance segmentation, Pedestrian.

| Model                          | aPCD (m)      | Mean of IoU $\times$ Confidence score | AP <sub>50:95</sub> | AP <sub>50</sub> | AP <sub>75</sub> | AP <sub>S</sub> | AP <sub>M</sub> | AP <sub>L</sub> | AR           | F1 <sub>50</sub> |
|--------------------------------|---------------|---------------------------------------|---------------------|------------------|------------------|-----------------|-----------------|-----------------|--------------|------------------|
| Clear daylight                 |               |                                       |                     |                  |                  |                 |                 |                 |              |                  |
| Mask R-CNN                     | 21.091        | 0.078                                 | 0.048               | 0.133            | 0.012            | 0.094           | 0.565           | 0.100           | 0.050        | 0.239            |
| ConvNeXt-V2                    | 23.448        | 0.092                                 | <b>0.068</b>        | <b>0.175</b>     | <b>0.021</b>     | 0.101           | <b>0.826</b>    | <b>0.700</b>    | <b>0.070</b> | <b>0.303</b>     |
| SOLOv2                         | 9.261         | 0.039                                 | 0.040               | 0.103            | 0.015            | 0.044           | 0.565           | 0.600           | 0.043        | 0.191            |
| Mask2Former                    | <b>23.547</b> | <b>0.096</b>                          | 0.055               | 0.154            | <b>0.021</b>     | <b>0.104</b>    | 0.652           | 0.300           | 0.057        | 0.272            |
| RTMDet                         | 5.941         | 0.025                                 | 0.033               | 0.069            | 0.030            | 0.017           | 0.478           | 0.500           | 0.035        | 0.135            |
| Rainy daylight                 |               |                                       |                     |                  |                  |                 |                 |                 |              |                  |
| Mask R-CNN                     | 2.238         | 0.010                                 | 0.006               | 0.017            | 0.003            | 0.011           | 0.0             | 0.091           | 0.008        | 0.039            |
| ConvNeXt-V2                    | <b>24.364</b> | <b>0.108</b>                          | <b>0.079</b>        | <b>0.212</b>     | <b>0.020</b>     | <b>0.147</b>    | <b>0.538</b>    | <b>0.818</b>    | <b>0.082</b> | <b>0.354</b>     |
| SOLOv2                         | 3.479         | 0.020                                 | 0.021               | 0.056            | 0.010            | 0.026           | 0.115           | 0.455           | 0.024        | 0.112            |
| Mask2Former                    | 15.942        | 0.072                                 | 0.037               | 0.096            | 0.017            | 0.049           | 0.231           | 0.727           | 0.039        | 0.181            |
| RTMDet                         | 3.162         | 0.018                                 | 0.022               | 0.060            | 0.003            | 0.026           | 0.269           | 0.182           | 0.024        | 0.118            |
| Rainy night                    |               |                                       |                     |                  |                  |                 |                 |                 |              |                  |
| Mask R-CNN                     | 0.0           | 0.001                                 | 0.0                 | 0.0              | 0.0              | 0.0             | 0.0             | 0.0             | 0.0          | 0.0              |
| ConvNeXt-V2                    | 0.0           | 0.001                                 | 0.0                 | 0.0              | 0.0              | 0.0             | 0.0             | 0.0             | 0.0          | 0.0              |
| SOLOv2                         | 0.0           | 0.001                                 | 0.0                 | 0.0              | 0.0              | 0.0             | 0.0             | 0.0             | 0.0          | 0.0              |
| Mask2Former                    | 0.0           | 0.002                                 | 0.0                 | 0.0              | 0.0              | 0.0             | 0.0             | 0.0             | 0.0          | 0.0              |
| RTMDet                         | 0.0           | 0.0                                   | 0.0                 | 0.0              | 0.0              | 0.0             | 0.0             | 0.0             | 0.0          | 0.0              |
| Rainy night under streetlights |               |                                       |                     |                  |                  |                 |                 |                 |              |                  |
| Mask R-CNN                     | 0.634         | 0.017                                 | 0.030               | 0.062            | 0.031            | 0.0             | 0.0             | 0.417           | 0.038        | 0.136            |
| ConvNeXt-V2                    | 2.879         | 0.028                                 | 0.012               | 0.042            | 0.0              | 0.0             | 0.083           | 0.167           | 0.018        | 0.099            |
| SOLOv2                         | 1.423         | 0.025                                 | <b>0.061</b>        | 0.094            | <b>0.073</b>     | 0.0             | <b>0.250</b>    | 0.417           | 0.070        | 0.189            |
| Mask2Former                    | <b>4.955</b>  | <b>0.038</b>                          | 0.030               | 0.062            | 0.031            | 0.0             | <b>0.250</b>    | 0.167           | 0.038        | 0.136            |
| RTMDet                         | 3.427         | 0.029                                 | 0.059               | <b>0.104</b>     | <b>0.073</b>     | 0.0             | 0.0             | <b>0.833</b>    | <b>0.068</b> | <b>0.206</b>     |

ing a P5 design, an expand ratio of 0.5, and deepen and widen factors of 1.33 and 1.25, respectively, with integrated channel attention. The CSPNeXtPAFPN neck re-

ceives feature maps of 320, 640, and 1280 channels and outputs 320-channel features with four CSP blocks. The RTMDetSepBNHead is configured with 320 input and fea-

ture channels and retains the 80-class setting with a DistancePointBBoxCoder. Training uses a base learning rate of 0.002 with a linear warm-up phase for the first 1000 iterations, followed by cosine annealing for the second half of the training schedule.
